# Supplementary material for: Effects of drying time on the formation of merged and soft MAPbI3 grains and their photovoltaic responses
Source: Nanoscale Adv. 2023 Mar 2;5(8):2190–8. doi: 10.1039/d2na00929c (PMC10089098; doi:10.1039/d2na00929c)
Supplement: NA-005-D2NA00929C-s001 [file NA-005-D2NA00929C-s001.pdf]

## Supporting information

### Effects of drying time on the formation of merged and soft MAPbI<sub>3</sub> grains and their photovoltaic responses

Anjali Chandel<sup>1,2,3</sup>, Qi Bin Ke<sup>1,2,3</sup>, Shou-En Chiang<sup>1,2,3</sup>, Hsin-Ming Cheng<sup>4,\*</sup>, Sheng Hsiung Chang<sup>1,2,3,\*\*</sup>

<sup>1</sup>Department of Physics, Chung Yuan Christian University, Taoyuan 320314, Taiwan, ROC

<sup>2</sup>Research Center for Semiconductor Materials and Advanced Optics, Chung Yuan Christian University, Taoyuan 320314, Taiwan, ROC

<sup>3</sup>Center for Nanotechnology, Chung Yuan Christian University, Taoyuan, 320314, Taiwan, ROC

<sup>4</sup>Department of Photonics, National Cheng Kung University, Tainan 701, Taiwan, ROC

[\\*smcheng.jemmy@gmail.com](mailto:smcheng.jemmy@gmail.com)

[\\*\\*shchang@cycu.edu.tw](mailto:shchang@cycu.edu.tw)

Corresponding authors: Hsin-Ming Cheng<sup>\*</sup>, Sheng Hsiung Chang<sup>\*\*</sup>

Telephone: +886-3-2653208

Fax : 886-3-2653299

### **Fabrication and environment conditions**

P3CT-Na/water solution (42 wt%) was spin-coated on top of the ITO/glass substrate at room temperatures. The environmental humidity was controlled to be lower than 50% RH. The spin rate and time of the P3CT-Na/water solution are 4000 rpm and 30 s, respectively.

MAPbI<sub>3</sub> precursor solution (1.5 M) was spin-coated on top of the P3CT-Na/ITO/glass sample at room temperatures in a nitrogen-filled glove box. A two step spin coating condition was used for the deposition of the MAPbI<sub>3</sub> thin film. In the first step, the spin rate and time are 400 rpm and 3 s, respectively. In the second step, the spin rate is 4000 rpm and the spin time is 29 s, 39 s or 49 s. During the spin coating process, a 180-μL CB was dropped at the 12<sup>th</sup> s. After the spin coating process, the sample was heated at 100 °C for 10 min, which formed MAPbI<sub>3</sub> crystalline thin film on top of the P3CT-Na/ITO/glass substrate.

PCBM/CB:BrB solution (2 wt%) was spin-coated on top of the MAPbI<sub>3</sub>/P3CT-Na/ITO/glass sample at room temperature in a nitrogen-filled glove box. The spin rate and time are 1200 rpm and 30 s, respectively.

Ag film was deposited on top of the BCP:PCBM/MAPbI<sub>3</sub>/P3CT-Na/ITO/glass sample by using the thermal evaporation method in a vacuum chamber. The pressure of the vacuum chamber is lower than  $2 \times 10^{-6}$  Torr. The deposition rate was lower than 0.1 nm/s.

### Encapsulation process

The photovoltaic cells were encapsulated by using a sandwich structure as shown in **Figure S1**. The cells were placed on top of the hotplate with fixed a temperature at 55 °C. One glass plate and one parafilm were used to cover the cell under a fixed weight of 1 Kg. The thicknesses of glass plate and Parafilm are 0.7 mm and 0.13 mm, respectively. The time for encapsulation process is 1 minute.

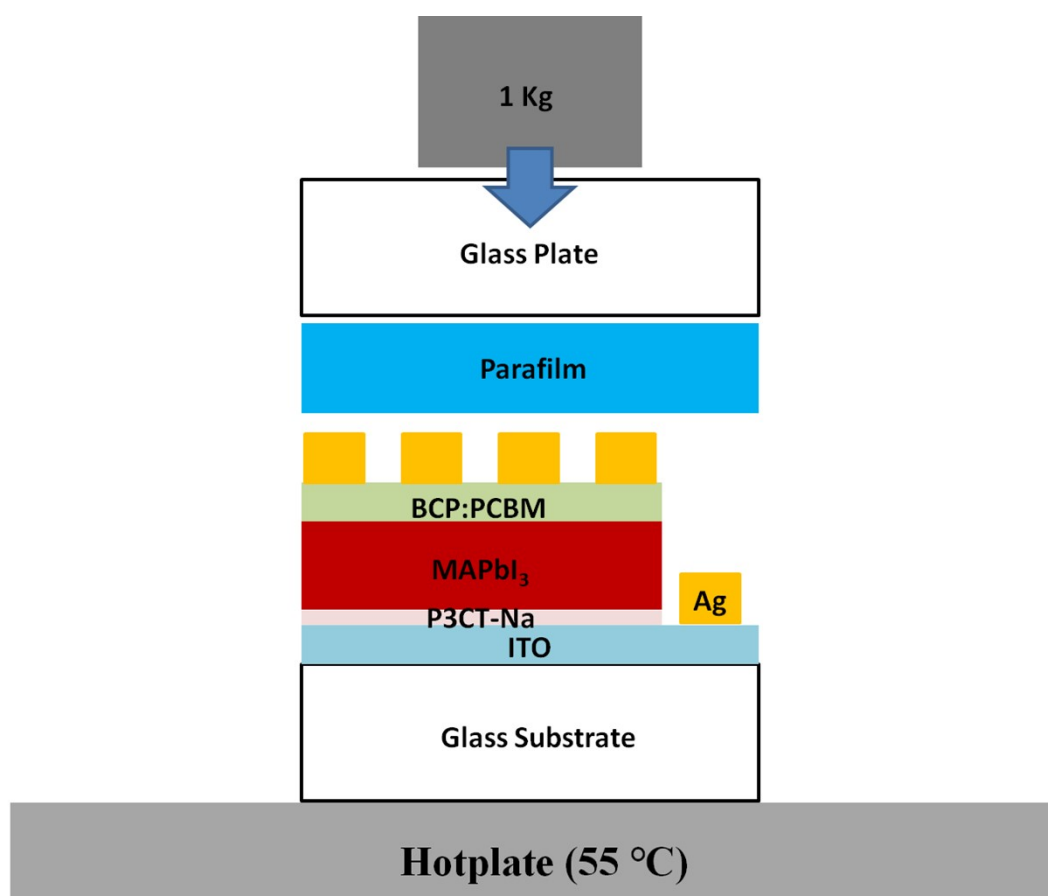

**Fig. S1.** Encapsulation of the photovoltaic cells.

## Setups of the transmittance and reflectance spectrometer

**Figure S2** presents two setups for the absorbance (transmittance) spectrum and reflectance spectrum, respectively. In **Figure S2 (a)**, the transmittance (T) of the sample can be measured when flipping the mirror down. The absorbance (A) can be calculated by using the equation ( $A = -\log(T)$ ). In **Figure S2 (b)**, the reflectance of the sample can be measured when flipping the mirror up. The mirror on the motorized linear stage is used as the reference of the reflectance spectrum.

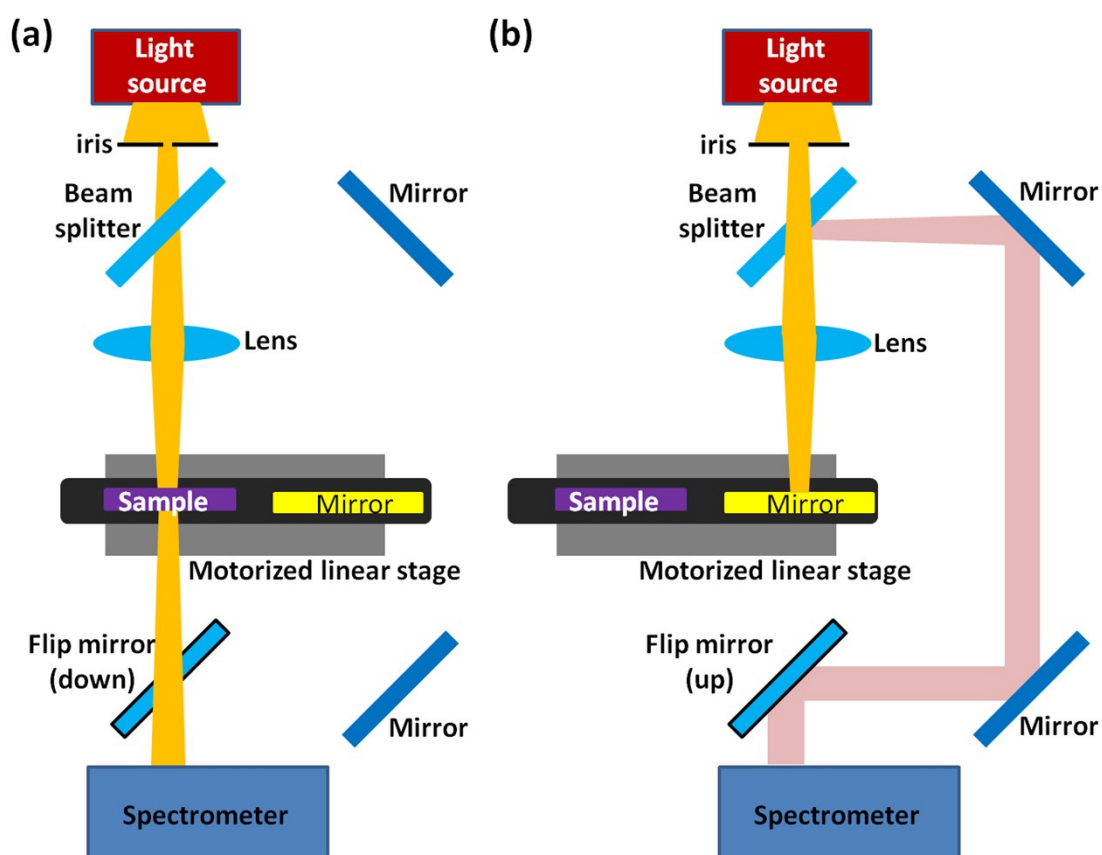

**Fig. S2.** (a) Setup for absorbance (transmittance) spectrum. (b) Setup for reflectance spectrum.

### JV curve and $V_{OC}$ hysteresis of the encapsulated MAPbI<sub>3</sub> solar cells

**Figure S3** (a), (b) and (c) present the forward and backward J-V curves of the encapsulated MAPbI<sub>3</sub> solar cells fabricated with the different drying times. The drying time-dependent  $V_{OC}$  hysteresis is plotted in **Figure S3** (d).

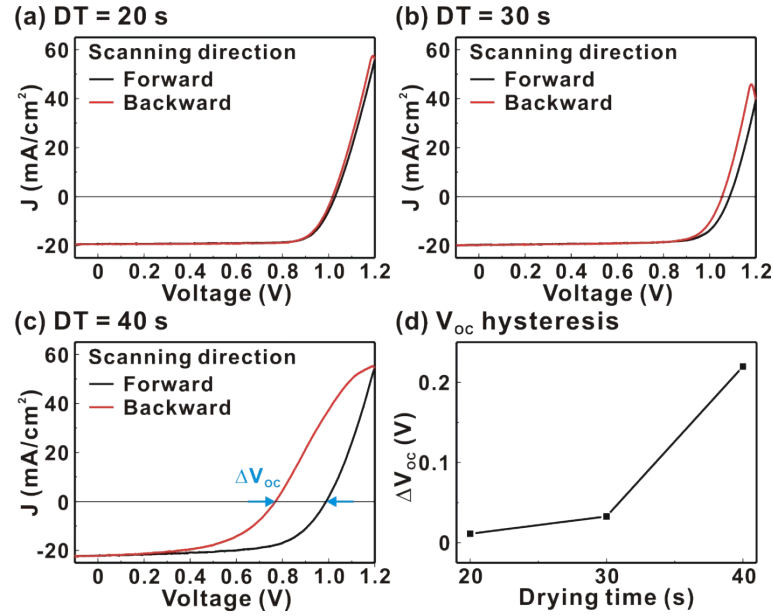

**Fig. S3.** Forward and backward current density-voltage curves of the encapsulated MAPbI<sub>3</sub> solar cells fabricated with the different drying times (DTs). (a) DT = 20 s; (b) DT = 30 s; (c) DT = 40 s. (d) Drying time dependent  $V_{OC}$  hysteresis.

### Experimental data and fitting curves of day-dependent $V_{OC}$ and FF values

**Figure S4** presents the experimental data and fitting curves of the  $V_{OC}$  and FF values when the encapsulated MAPbI<sub>3</sub> solar cells are fabricated with the different drying times from 20 s to 40 s.

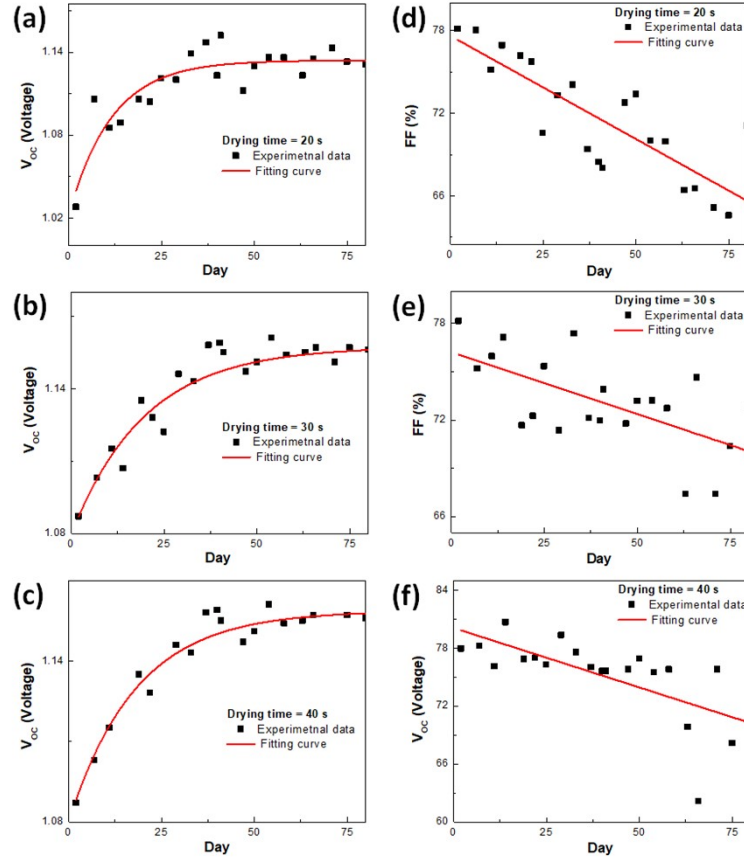

**Fig. S4.** Experimental data and fitting curves of day-dependent  $V_{OC}$  and FF values. (a)  $V_{OC}$ , drying time = 20 s; (b)  $V_{OC}$ , drying time = 30 s; (c)  $V_{OC}$ , drying time = 40 s; (d) FF, drying time = 20 s; (e) FF, drying time = 30 s; (f) FF, drying time = 40 s.

### Incident photon-to-current conversion efficiency (IPCE) spectra

**Figure S5** presents the IPCE spectra and the integrated current density curves of the encapsulated perovskite photovoltaic cells measured on the 407<sup>th</sup> day. **Equation S1** is used to calculate the IPCE.

$$\text{IPCE}(\lambda) = \frac{J_{\text{ph}} \times 1240}{I_{\text{light}} \times \lambda}, \quad (\text{S1})$$

where  $J_{\text{ph}}$  is the measured photocurrent density,  $I_{\text{light}}$  is the intensity of incident photons, and  $\lambda$  is the wavelength of incident photons. In the measurements, the light intensity is fixed at 4 mW/cm<sup>2</sup>. The wavelength is varied from 450 nm to 850 nm.

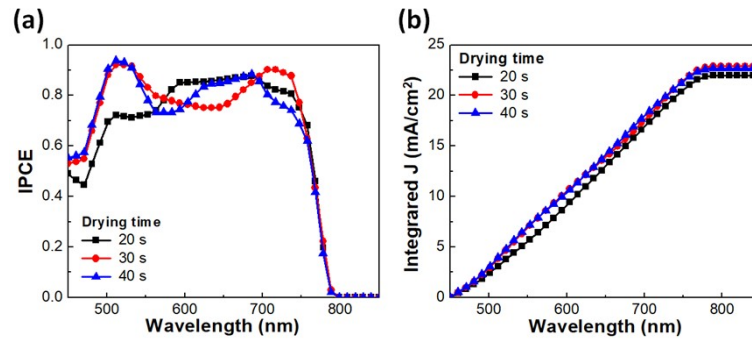

**Fig. S5.** (a) IPCE spectra of the encapsulated perovskite photovoltaic cells. (b) Integrated current density curves of the encapsulated perovskite photovoltaic cells.
